# Supplementary figures and images for: Emulsification liquid–liquid microextraction based on deep eutectic solvents: an extraction method for the determination of sulfonamides in water samples
Source: Royal Society of Chemistry journal article supplement (doi:10.1039/c7ay01332a), 2017-01-01

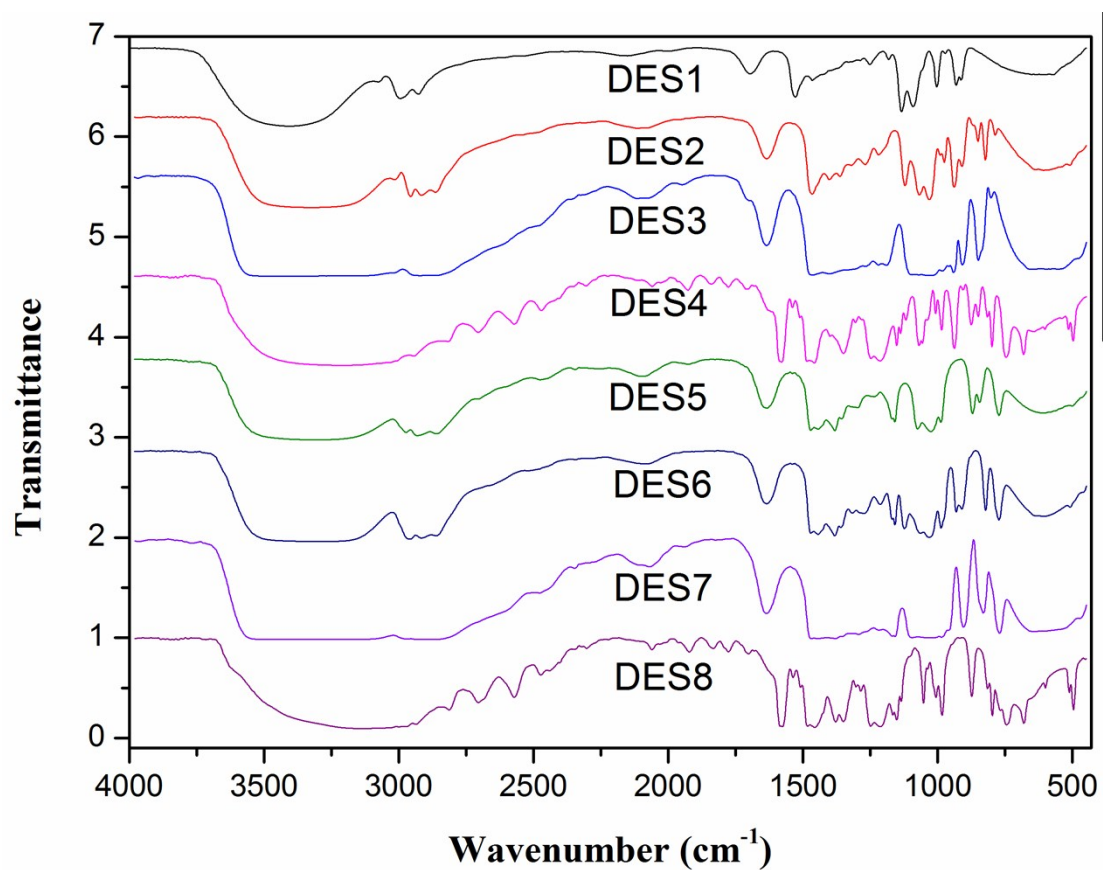

Fig. S1 FT-IR spectra of synthesized DESs

Supplement: c7ay01332a1.pdf [file c7ay01332a1.pdf]
